# Supplementary material for: Alterations in Hydrological Responses under Changing Climate and Land Use/Land Cover across Contrasting Agroecological Environments: A Case Study on the Chemoga Watershed in the Upper Blue Nile Basin, Ethiopia
Source: MDPI journal article supplement (doi:10.3390/w16071037), 2024-04-04
Supplement: s1 [file s1]

Archive with 1 entries (1 files):
- water-2921618-supplementary.pdf
