# Supplementary material for: Alterations in Hydrological Responses under Changing Climate and Land Use/Land Cover across Contrasting Agroecological Environments: A Case Study on the Chemoga Watershed in the Upper Blue Nile Basin, Ethiopia
Source: MDPI journal article supplement (doi:10.3390/w16071037), 2024-04-04
Supplement: s1 [file s1 › water-2921618-supplementary.pdf]

**Supplementary Material for Modeling the hydrological responses to changing climate and land use/land cover across contrasting agroecological environments: A case study in Chemoga watershed in the Upper Blue Nile Basin, Ethiopia**

Taye Minichil Meshesha <sup>1,2, \*</sup>, Atsushi Tsunekawa <sup>3</sup>, Nigussie Haregeweyn <sup>4</sup>, Mitsuru Tsubo <sup>3</sup>, Ayele Almaw Fenta <sup>4</sup>, Mulatu Liyew Berihun <sup>5,6</sup>, Arega Mulu <sup>2</sup>, Ashebir Sewale Belay <sup>7</sup>, Dagnenet Sultan <sup>3, 6</sup>, Kindiye Ebabu <sup>8</sup>, Tadesual Asamin Setargie <sup>6,9</sup>, Samuel Berihun Kassa <sup>1,2</sup>, Yoseph Buta Hailu <sup>1,2</sup>, Takashi Abe <sup>4</sup>

<sup>1</sup> The United Graduate School of Agricultural Sciences, Tottori University, 4-101 Koyama-Minami, Tottori 680-8553, Japan.

<sup>2</sup> School of Civil and Water Resource Engineering, Debre Markos Institute of Technology, Debre Markos University, P.O. Box 269, Debre Markos, Ethiopia.

<sup>3</sup> Arid Land Research Center, Tottori University, 1390 Hamasaka, Tottori 680-0001, Japan.

<sup>4</sup> International Platform for Dryland Research and Education, Tottori University, 1390 Hamasaka, Tottori 680-0001, Japan.

<sup>5</sup> Department of Agricultural and Biological Engineering, Tropical Research and Education Center, IFAS, University of Florida, Homestead, FL, USA.

<sup>6</sup> Faculty of Civil and Water Resources Engineering, Bahir Dar Institute of Technology, Bahir Dar University, P.O. Box 26, Bahir Dar, Ethiopia.

<sup>7</sup> School of Earth Sciences, Bahir Dar University, P.O. Box 79, Bahir Dar, Ethiopia.

<sup>8</sup> College of Agriculture and Environmental Sciences, Bahir Dar University, P.O. Box 5501, Bahir Dar, Ethiopia.

<sup>9</sup> Blue Nile Water Institute, Bahir Dar University, Bahir Dar, Ethiopia.

**Corresponding author:** Taye Minichil Meshesha ([m.tayemeshesha21@gmail.com](mailto:m.tayemeshesha21@gmail.com))

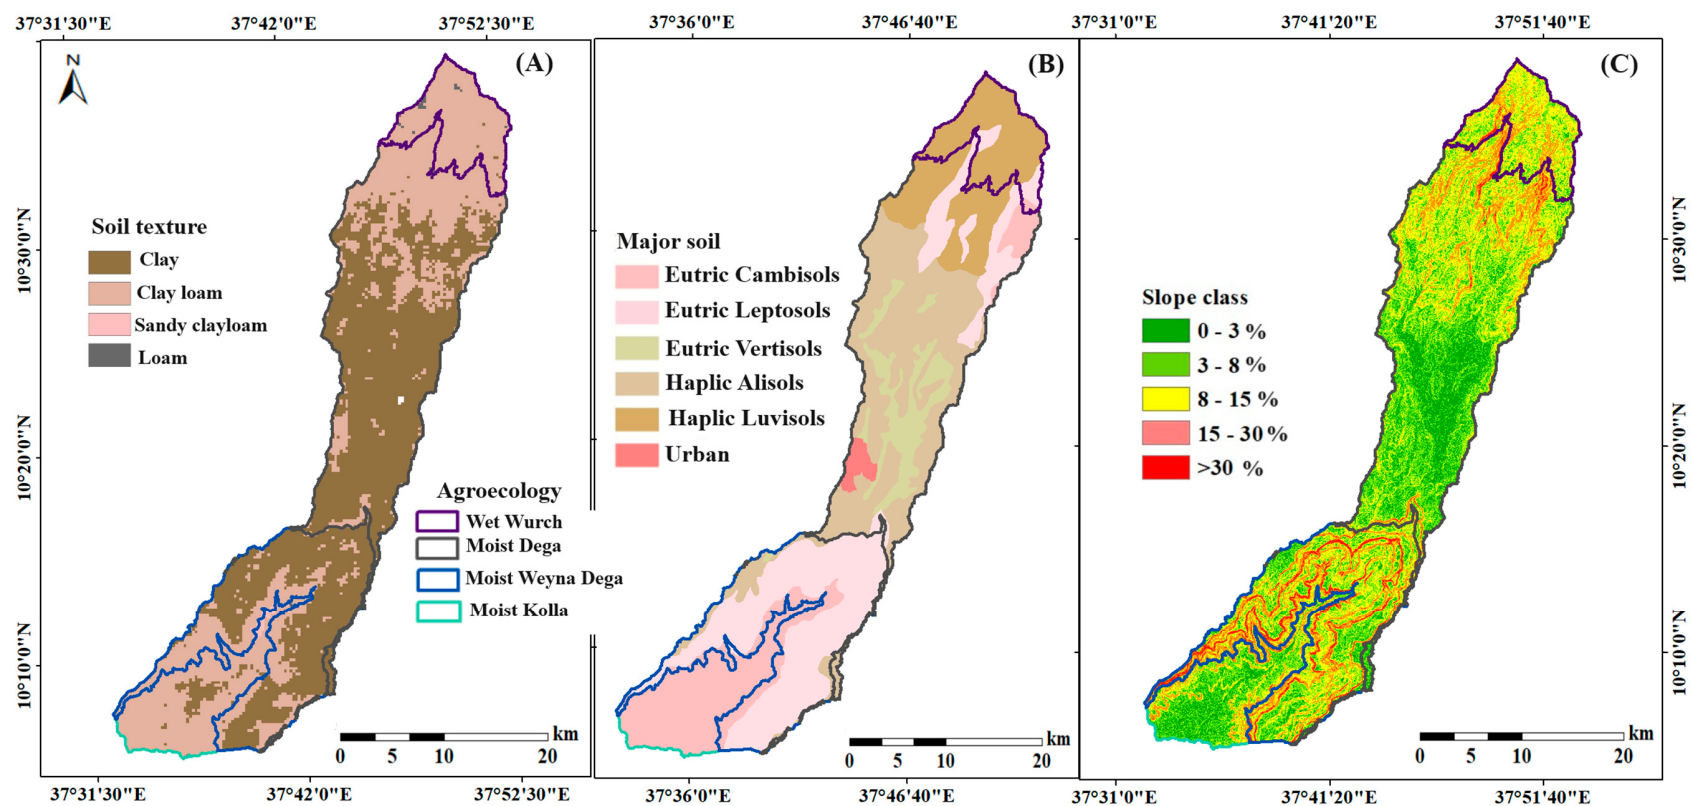

**Figure S1.** Major soil textures (A), types (B), and slope classes (C) within distinct agroecological regions in Chemoga watershed.

**Table S1.** Typical characteristics of four agroecological environments in Chemoga watershed.

|                                    | Typical characteristics                     |                                                                        |                        |                                  |
|------------------------------------|---------------------------------------------|------------------------------------------------------------------------|------------------------|----------------------------------|
|                                    | Wet Wurch                                   | Moist Dega                                                             | Moist Weyna Dega       | Moist Kolla                      |
| Mean annual temperature range (°C) | 4.7–17.4                                    | 8.8–22.7                                                               | 13.9–25.5              | 15.7–28.9                        |
| Mean annual rainfall (mm)          | 1513                                        | 1311                                                                   | 1251                   | 1108                             |
| Altitude (m)                       | >3200                                       | 2300–3200                                                              | 1500–2300              | < 1500                           |
| Major crops                        | Barley and potato                           | Wheat, teff, barley, potato, fava bean and engido ( <i>Avena</i> spp.) | Maize, wheat, and teff | Sorghum, maize, and haricot bean |
| Slope class (% range)              | Area contribution to each slope classes (%) |                                                                        |                        |                                  |
| Flat (0–3)                         | 0.8                                         | 7.9                                                                    | 2.0                    | 21.2                             |
| Gentle (3–8)                       | 6.7                                         | 27.3                                                                   | 12.0                   | 42.5                             |
| Sloping (8–15)                     | 26.8                                        | 29.6                                                                   | 23.3                   | 19.0                             |
| Steep (15–30)                      | 52.3                                        | 26.4                                                                   | 31.3                   | 16.3                             |
| Very steep (>30)                   | 13.5                                        | 8.8                                                                    | 31.5                   | 1.0                              |

Wet Wurch is characterized by steep slopes covering 52.3 % of its area. Moist Dega primarily consists of moderately sloping terrain, covering 29.6 % of its area. Around 31.5 % of the Moist Weyna Dega agroecology is covered by very steep slopes, whereas Moist Kolla is primarily covered by gentle slopes, covering 42.5 % of its area. The slope measurements were derived from SRTM–DEM data.

### **1A. Land use/land cover (LULC) change analysis**

The LULC maps were produced from Landsat satellite images of TM, ETM+, and OLI for 1985, 1995, 2013, and 2020 with 30-m spatial resolution downloaded from the United States Geological Survey (<https://earthexplorer.usgs.gov>). In addition to Landsat satellite images, 12 aerial photographs (scale 1:50,000) taken in 1984 and 1985 obtained from the Ethiopian Mapping Agency (EMA) were used as auxiliary input data for the LULC classification of 1985. The images were selected by considering data availability, anticipated major LULC changes due to regime (Gov't) change and policies related to land use and agriculture by the government. Image was classified using hybrid (unsupervised and supervised) classification techniques [1]. Each Landsat image was iso-clustered into 500 classes. Supervised classification was then applied by geo-linking with Google Earth, and a pixel-based supervised classification to six LULC categories (built-up, cropland, forest, grassland, woodland, and water body). The analysis was done both at watershed scale and separately considering the four distinct agroecological environments within the watershed. Details can be found in [2].

The watershed level analysis evaluated changes from 1983 to 2020 and from 2021 to 2060. Cropland increased by 23 % in the earlier period and further increased by 3 % by 2060 under the business-as-usual (BAU). Woodland and grassland decreased by 23 % and 5 %, respectively, in the past 35 years and further decreased by 6 % and 3 %, respectively, by 2060 under the BAU LULC change scenario. In contrast, under the land conservation (LC) scenario, there was a significant shift towards forest restoration (8 % increase), along with the conservation of grasslands by 2060.

When considering the distinct agroecological environments, important transitions and changes were identified that were not apparent at the watershed level [2]. These transitions likely indicate more specific and localized alterations in LULC within these environments (Figure S2). In 1985, woodland dominated in Wet Wurch and Moist Kolla, while cropland dominated in Moist Dega and Moist Weyna Dega agroecological environments (Figure S2). Over the past 35 years, the most substantial changes in all agroecological environments were the expansion of cropland accompanied by the reduction of grassland in

Moist Dega and woodland in the other agroecological environments (Figure S2). The most substantial change was observed in Moist Kolla, where cropland increased dramatically by 53.5 %, followed by that in the Wet Wurch agroecology, where cropland increased by 27.1 % mainly at the expense of woodland during the historical study period. The projected BAU LULC change showed a further increase of cropland in the Moist Kolla agroecology by 28.1 % with the decline of woodland by 31.6 % expected in the future to 2060. In contrast, in the LC scenario there was a significant shift towards vegetation cover restoration over steep slopes, with a substantial increase in forest coverage (12.8 %) in the Moist Weyna Dega agroecology (Figure S2).

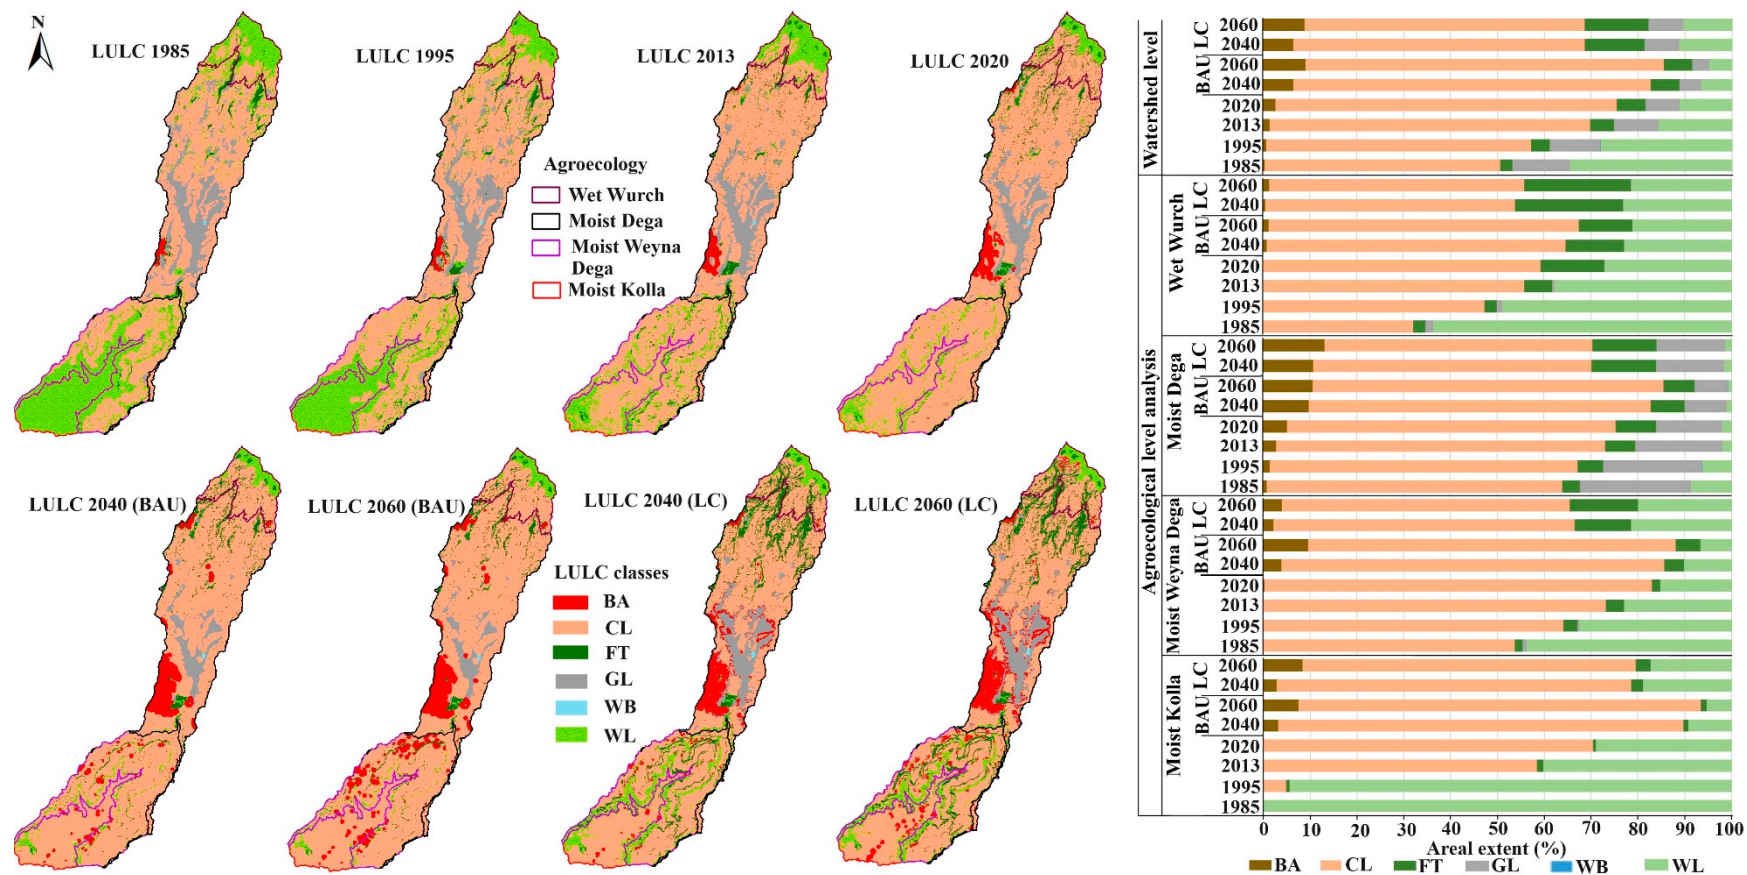

**Figure S2.** Land use land cover maps (left) and areal extent of land use and land cover (LULC) categories (right) at the watershed level and in four different agroecological environments. BAU and LC denotes for Projected LULC maps under business-as-usual and land conservation scenarios, respectively. BA: built-up area; CL: cropland; FT: Forest; GL: grassland; WB: water body; and WL: woodland (source:[2]).

## 1B. CA-Markov model

The hybrid CA-Markov model integrates CA as a spatial distribution of transitions with the Markov Chain probability matrix. Prediction of LULC changes using the CA-Markov model involves three main activities [3] (Figure S3): (1) the development of a probability matrix (Eq. 1) and an area matrix from a pair of past LULC maps using the Markov module, (2) creation of a suitability map that consists of factors and constraints, and (3) use of special allocation in the CA-Markov module (Eq. 2):

$$P = \begin{bmatrix} P_{11} & P_{12} & \dots & P_{1n} \\ P_{21} & P_{22} & \dots & P_{2n} \\ \dots & \dots & \dots & \dots \\ P_{n1} & P_{n2} & \dots & P_{nm} \end{bmatrix} \quad (1)$$

where  $\sum_{i=1}^n P_{ij} = 1, 0 \leq P_{ij}, P_{ij}$  is the transition probability from LULC type  $i$  to type  $j$ , and  $n$  is the number of LULC types.

$$L_{t+1} = P \times L_t \quad (2)$$

where  $L_t$  and  $L_{t+1}$  are the LULC at time of  $t$  and  $t + 1$ , respectively, and  $P$  is the transition probability matrix in a state that is calculated as follows:

The prediction capacity of the CA-Markov model was assessed by simulating the 2020 LULC map by using the 2005 and 2013 LULC maps and comparing with the simulated results to the classified 2020 LULC map. The simulated map of 2020 agreed very well with the classified LULC map of 2020, and the model validation results of  $K_{no}$  (96.3 %),  $K_{location}$  (95.7 %),  $K_{locationStrata}$  (95.7 %), and  $K_{standard}$  (92.3 %). Finally, the validated hybrid CA-Markov model was used to produce the LULC maps of 2040 and 2060 under two alternative scenarios: business-as-usual and land conservation. Prediction of LULC changes using the CA-Markov model involves three main activities [3]: (1) the development of a probability matrix and an area matrix from a pair of past LULC maps using the Markov module, (2) creation of a suitability map that consists of factors and constraints using a multicriteria evaluation (MCE) module, and (3) use of special allocation in the CA-Markov model.

The suitability map is a combination of multiple factors and constraints used to guide the relative suitability of land allocation in the simulation of LULC change using the CA-Markov model [4]. Table S3 shows the factors and constraints considered for the LULC simulation.

**Table S2.** Factors and constraints considered and their weights for predicting LULC conditions in the Chemoga watershed.

| LULC category | Factors                      | Factor weight | Consistency ratio | Constraints               |
|---------------|------------------------------|---------------|-------------------|---------------------------|
| Built-up      | Suitable areas to built-up   | 0.6783        | 0.03              | Slope > 15 %<br>Grassland |
|               | Distance to market centers   | 0.1388        |                   |                           |
|               | Distance to road             | 0.1293        |                   |                           |
|               | Slope                        | 0.0537        |                   |                           |
| Cropland      | Suitable areas to cropland   | 0.7854        | 0.07              | Slope > 15 %<br>Grassland |
|               | Distance to rivers           | 0.0658        |                   |                           |
|               | Slope                        | 0.1488        |                   |                           |
| Forest        | Suitable areas to forest     | 0.6716        | 0.07              |                           |
|               | Distance to rivers           | 0.0629        |                   |                           |
|               | Slope                        | 0.2654        |                   |                           |
| Grassland     | Suitable areas to grassland  | 0.7695        | 0.03              |                           |
|               | Distance to river            | 0.1040        |                   |                           |
|               | Slope                        | 0.1265        |                   |                           |
| Water Body    | Suitable areas to water body | 0.4507        | 0.01              |                           |
|               | Distance to river            | 0.4901        |                   |                           |
|               | Slope                        | 0.0592        |                   |                           |
| Woodland      | Suitable areas to woodland   | 0.6491        | 0.06              |                           |
|               | Slope                        | 0.0719        |                   |                           |
|               | Elevation                    | 0.2790        |                   |                           |

The suitability map for the BAU scenario was prepared from a weighted linear combination of factors for each LULC category (Table S2). The factors were standardized from 0 to 256 in a fuzzy membership function that implies 0 for less suitable and 256 for more suitable land for conversion to a specific LULC category. In the same way, the suitability map of the LC scenario was prepared by adding the constraints with Boolean images to the factors applied in the BAU scenario. The constraints were standardized to 0 (not suitable) or 1 (suitable) for land use conversion (Table S2, Figure S3).

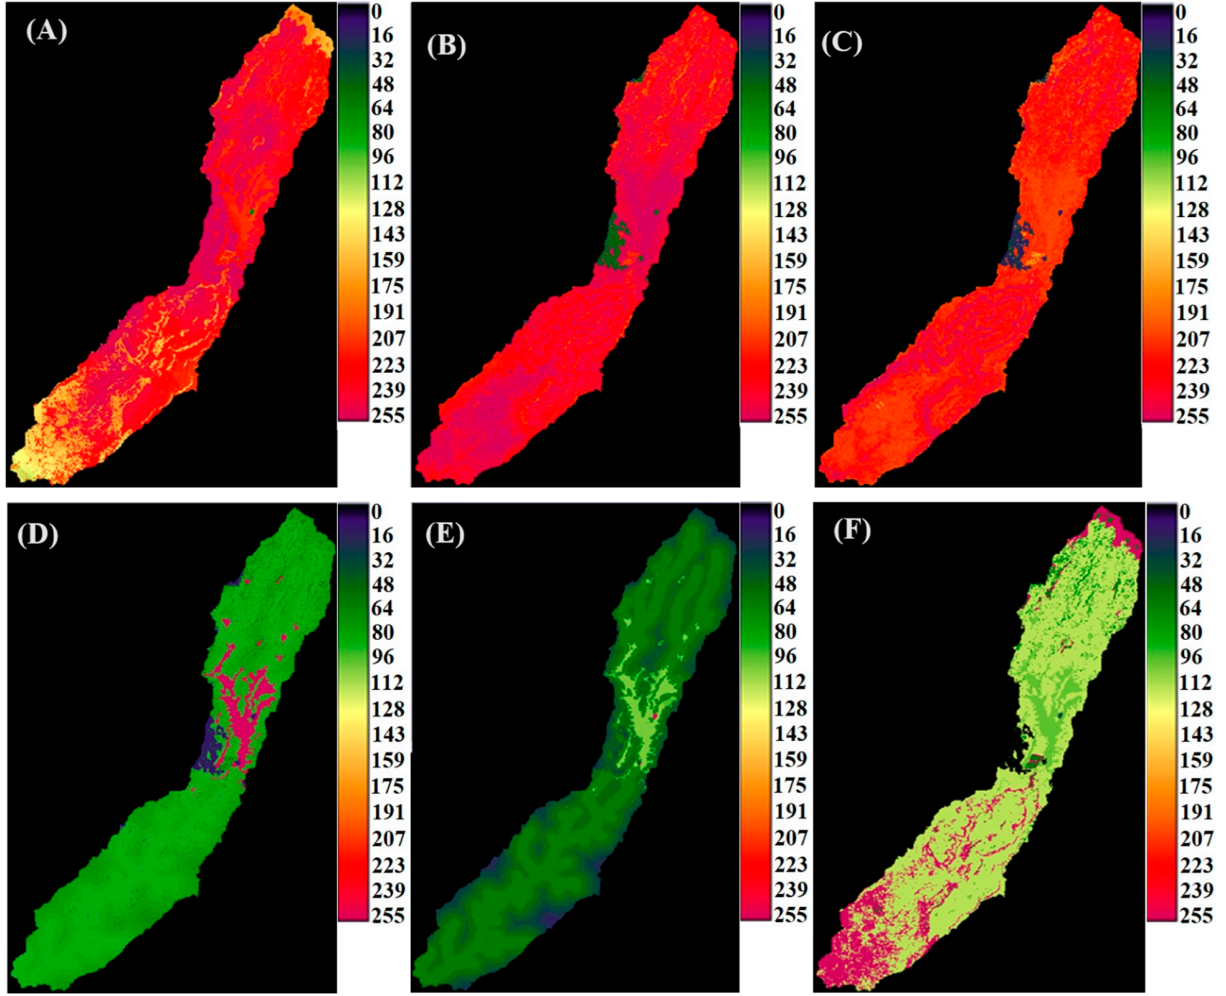

**Figure S3.** Suitability map for land allocation to (A) built-up, (B) cropland, (C) forest, (D) grassland, (E) water body, and (F) woodland in the Chemoga watershed.

The areal extent of losses, gains, and percentage of changes for each LULC change were computed using Eqs. (3), (4), and (5), respectively:

$$P_{loss(i),j} = \frac{(P_{i,j} - P_{j,i})}{(P_{ci} - P_{ri})} \times 100, i \neq j \quad (3)$$

$$P_{gain(i),j} = \frac{(P_{j,i} - P_{i,j})}{(P_{ci} - P_{ri})} \times 100, i \neq j \quad (4)$$

$$Percent\ change\ (\%) = \left( \frac{A_{i+1} - A_i}{A_1} \right) \times 100 \quad (5)$$

where  $P_{loss(i),j}$  is the percentage taken by LULC category  $j$  from category  $i$ ;  $P_{gain(i),j}$  is the percentage taken by type  $i$  from category  $j$ ;  $P_{i,j}$  and  $P_{j,i}$  are the individual entries in a given change matrix;  $P_{ci}$  is the column

total of type  $i$ ; and  $P_{ri}$  is the row total for type  $i$ .  $A_1$  is the area in year 1 and  $A_2$  is the area in year 2 of a LULC type (ha).

The use of alternative scenarios to predict LULC is helpful for decision makers and local land use planners for effective and sustainable land management in the future [5,6]. The BAU and LC scenarios were formulated based on the land use and watershed characteristics of the study area and a literature review related to future land use plans [6] and land use policies of the Ethiopian government [2]. The BAU scenario assumed the continuation of recent past trends of socioeconomic activities related to LULC change without any management intervention, whereas the LC scenario was designed to consider management intervention for sustainable land use. The LC scenario considered the land capability approach, which avoids cultivation and settlement expansion on steep slopes ( $>15\%$ ) [5,7], as well as the strict implementation of existing spatial policies of the Ethiopian government for forest and water body conservation [2].

## **2A. General Climate Models (GCMs)**

From a thorough evaluation of over 31 available GCMs, ten were carefully selected for downscaling and ensemble use (Table S3), with the primary consideration being the availability of historical and future climate variables, such as precipitation and minimum and maximum temperatures, for both the SSP2-4.5 and SSP5-8.5 scenarios on a daily basis.

**Table S3.** Global climate models used in this study.

| Model Name           | Organization                                                                                                                                               | Resolution<br>(° lat. x long.) |
|----------------------|------------------------------------------------------------------------------------------------------------------------------------------------------------|--------------------------------|
| ACCESS-CM2           | Commonwealth Scientific and Industrial Research Organization,<br>Australian Research Council Centre of Excellence for Climate<br>System Science, Australia | 1.250 x 1.875                  |
| INM-CM5-0            | Institute for Numerical Mathematics, Russian Academy of<br>Science, Moscow, Russia                                                                         | 1.500 x 2.000                  |
| CMCC-ESM2            | Centro Euro-Mediterraneo sui Cambiamenti Climatici, Italy                                                                                                  | 0.938 x 1.250                  |
| CNRM-ESM2-1          | National Center of Meteorological Research, France                                                                                                         | 1.406 x 1.406                  |
| EC-Earth3-Veg-<br>LR | EC-Earth consortium, Rossby Center, Swedish Meteorological<br>and Hydrological Institute, Sweden                                                           | 1.125 x 1.125                  |
| CNRM-CM6-1           | Centre National de Recherches Météorologiques–Centre<br>Européen de Recherche et de Formation Avancée en Calcul<br>Scientifique, France                    | 1.406 x 1.406                  |
| INM-CM4-8            | Institute for Numerical Mathematics, Russian Academy of<br>Science, Moscow, Russia                                                                         | 1.500 x 2.000                  |
| MPI-ESM1-2-<br>LR    | Max Planck Institute for Meteorology, Germany                                                                                                              | 1.875 x 2.500                  |
| MRI-ESM2-0           | Meteorological Research Institute, Japan                                                                                                                   | 1.125 x 1.125                  |
| MIROC6               | Japan Agency for Marine-Earth Science and Technology,<br>Atmosphere and Ocean Research Institute, Japan                                                    | 1.406 x 1.406                  |

For statistical downscaling techniques, we employed the widely used empirical quantile mapping (EQM) method (Eq. 6). EQM calibrates a model's cumulative distribution function (CDF) by adjusting both the mean and individual delta changes for observed climate variable quantiles [8]. It has the advantage of producing adjusted empirical CDFs (ECDFs) for dry and wet days and can simultaneously correct precipitation occurrence frequencies and standard deviations [9]. The EQM method corrects means, variances, quantiles, wet day frequencies, and intensities while nonlinearly preserving extreme values [9]. Therefore, the variability of corrected data is more consistent with the original GCMs data [10].

$$P_{corr}^{EQM} = ECDF_{obs}^{-1}(ECDF_{GCM}(P_{GCM})) \quad (6)$$

where  $P_{corr}^{EQM}$  is the bias corrected precipitation,  $ECDF_{obs}^{-1}$  is the inverse of empirical cumulative distribution function of observed precipitation,  $ECDF_{GCM}$  is empirical cumulative distribution function of GCM precipitation, and  $P_{GCM}$  is raw precipitation data from the GCMs.

**Table S4.** Mann–Kendall and Sen’s slope results for rainfall (mm/year) and maximum and minimum temperature (°C/year) trends.

| Climate                |             | Agroecology |          |          |            |          |          |                  |          |          |             |          |          |
|------------------------|-------------|-------------|----------|----------|------------|----------|----------|------------------|----------|----------|-------------|----------|----------|
| variables              |             | Wet Wurch   |          |          | Moist Dega |          |          | Moist Weyna Dega |          |          | Moist Kolla |          |          |
|                        |             | Observed    | SSP2-4.5 | SSP5-8.5 | Observed   | SSP2-4.5 | SSP5-8.5 | Observed         | SSP2-4.5 | SSP5-8.5 | Observed    | SSP2-4.5 | SSP5-8.5 |
| Rainfall               | z-stat      | 1.4         | 2.53*    | 5.95*    | 0.86       | 2.31*    | 6.01*    | 1.35             | 2.81*    | 5.73*    | 2.47*       | 3.11*    | 5.96*    |
|                        | Sen's Slope | 0.03        | 1.59     | 5.91     | 2.59       | 1.27     | 5.07     | 2.04             | 1.4      | 3.97     | 4.80        | 1.55     | 3.55     |
| Maximum<br>temperature | z-stat      | 4.40*       | 9.16*    | 10.26*   | 4.40*      | 9.22*    | 10.32*   | 2.44*            | 9.47*    | 10.31*   | 1.21        | 9.47*    | 10.41*   |
|                        | Sen's Slope | 0.03        | 0.02     | 0.03     | 0.03       | 0.02     | 0.03     | 0.02             | 0.02     | 0.03     | 0.01        | 0.02     | 0.03     |
| Minimum<br>temperature | z-stat      | 5.30*       | 9.67*    | 10.35*   | 5.76*      | 9.6*     | 10.41*   | 4.18*            | 9.63*    | 10.49*   | 4.89*       | 9.66*    | 10.5*    |
|                        | Sen's Slope | 0.05        | 0.02     | 0.03     | 0.03       | 0.02     | 0.04     | 0.04             | 0.03     | 0.05     | 0.05        | 0.03     | 0.06     |

\* Statistically significant at 5% significant level.

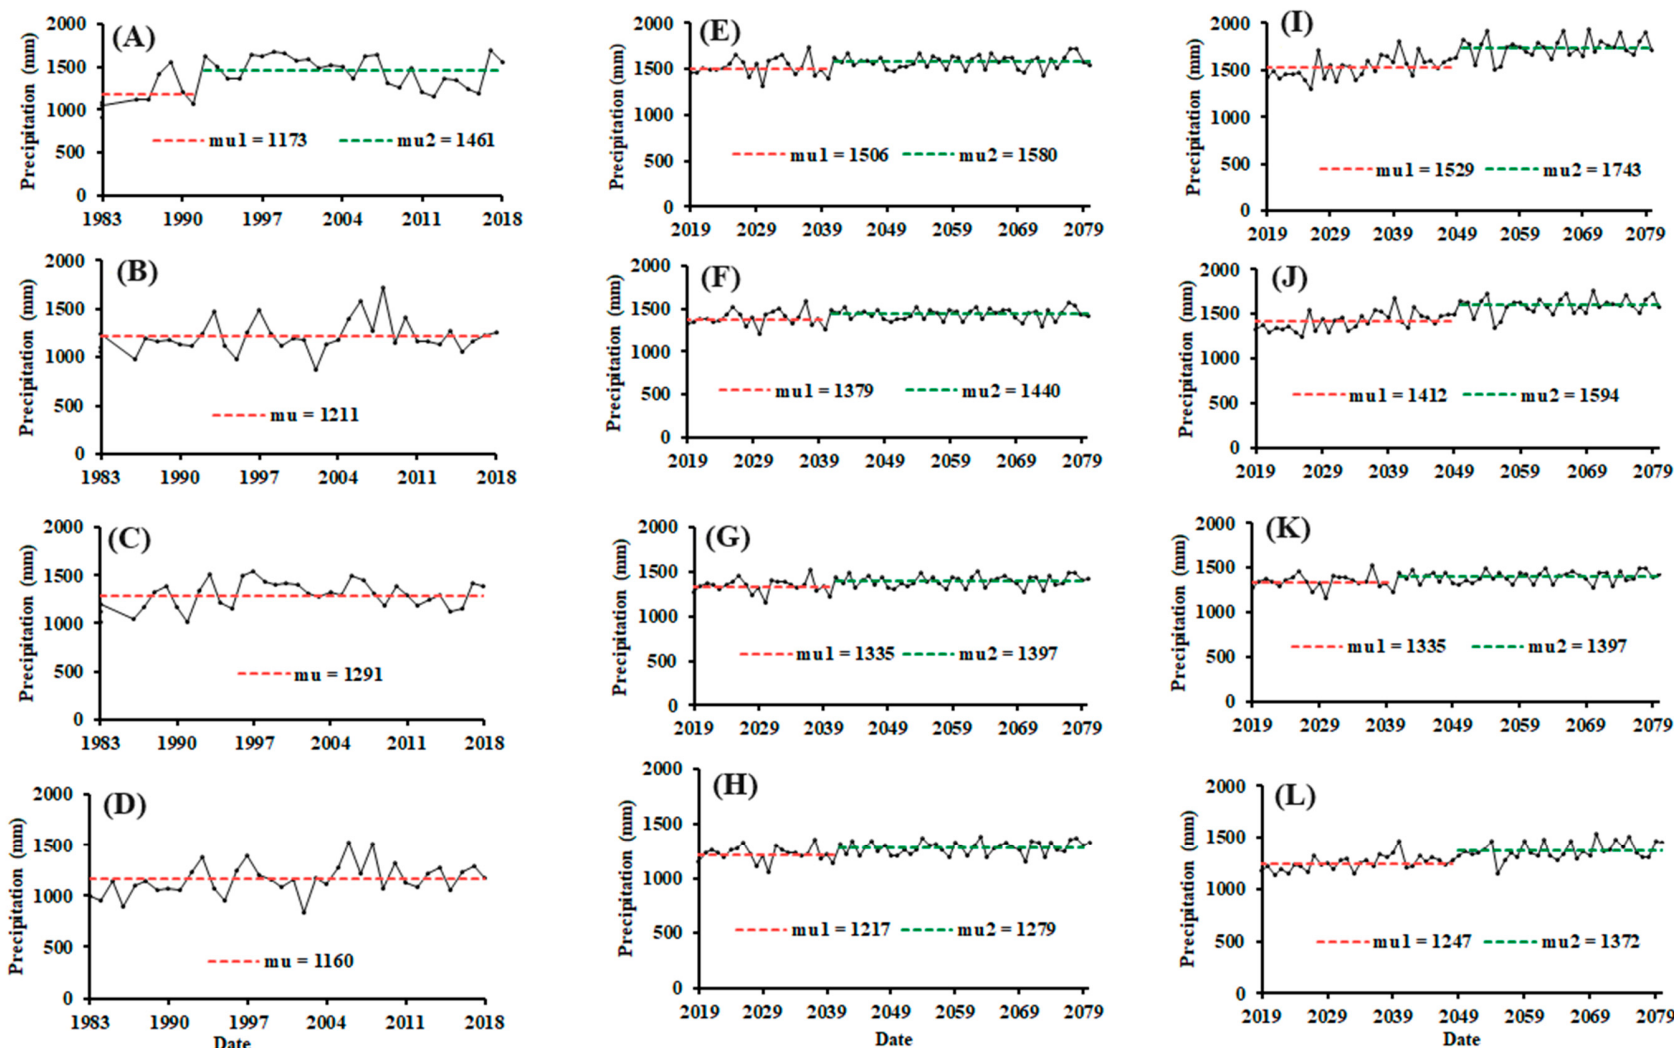

**Figure S4.** Pettitt's test for change point detection in historical rainfall (A–D) and future downscaled rainfall under the SSP2-4.5 climate scenario (E–H) and under the SSP5-8.5 climate scenario (I–L) in the Wet Wurch, Moist Dega, Moist Weyna Dega, and Moist Kolla agroecological environments, respectively. Where  $\mu_1$  and  $\mu_2$  are the mean precipitation before and after change point has occurred respectively.

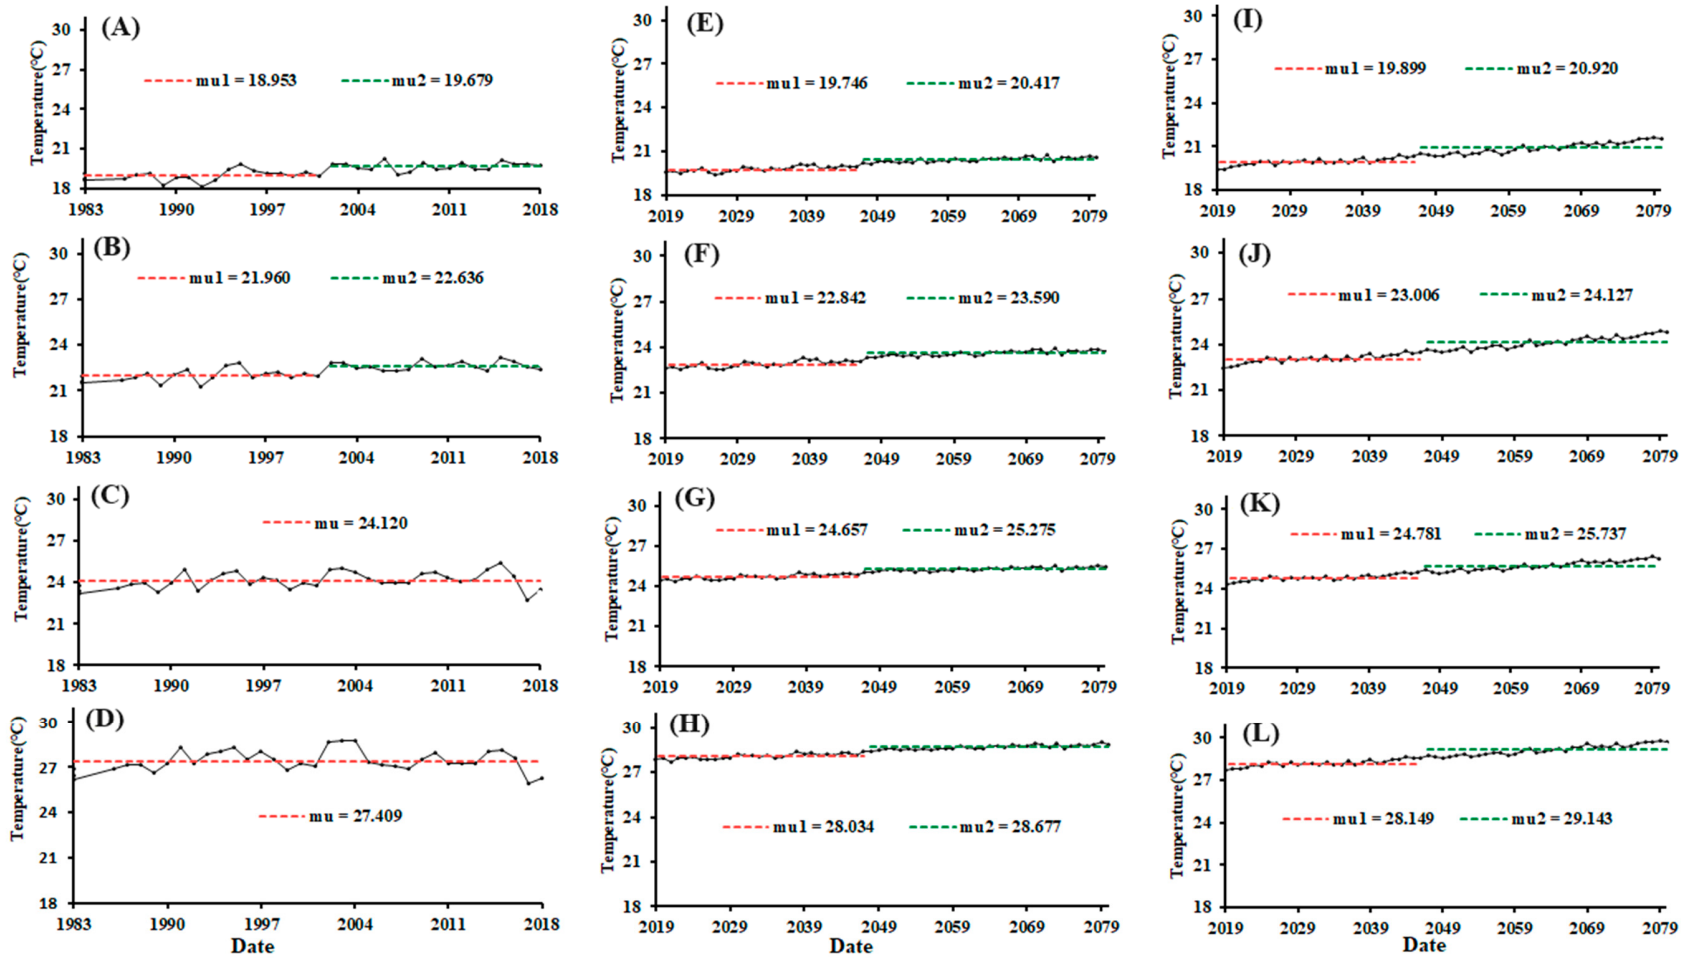

**Figure S5.** Pettitt's test for change point detection in historical maximum temperature (A–D) and future downscaled maximum temperature under the SSP2-4.5 climate scenario (E–H) and under the SSP5-8.5 climate scenario (I–L) in the Wet Wurch, Moist Dega, Moist Weyna Dega, and Moist Kolla agroecological environments respectively. Where  $\mu_1$  and  $\mu_2$  are the mean maximum temperature before and after change point has occurred respectively.

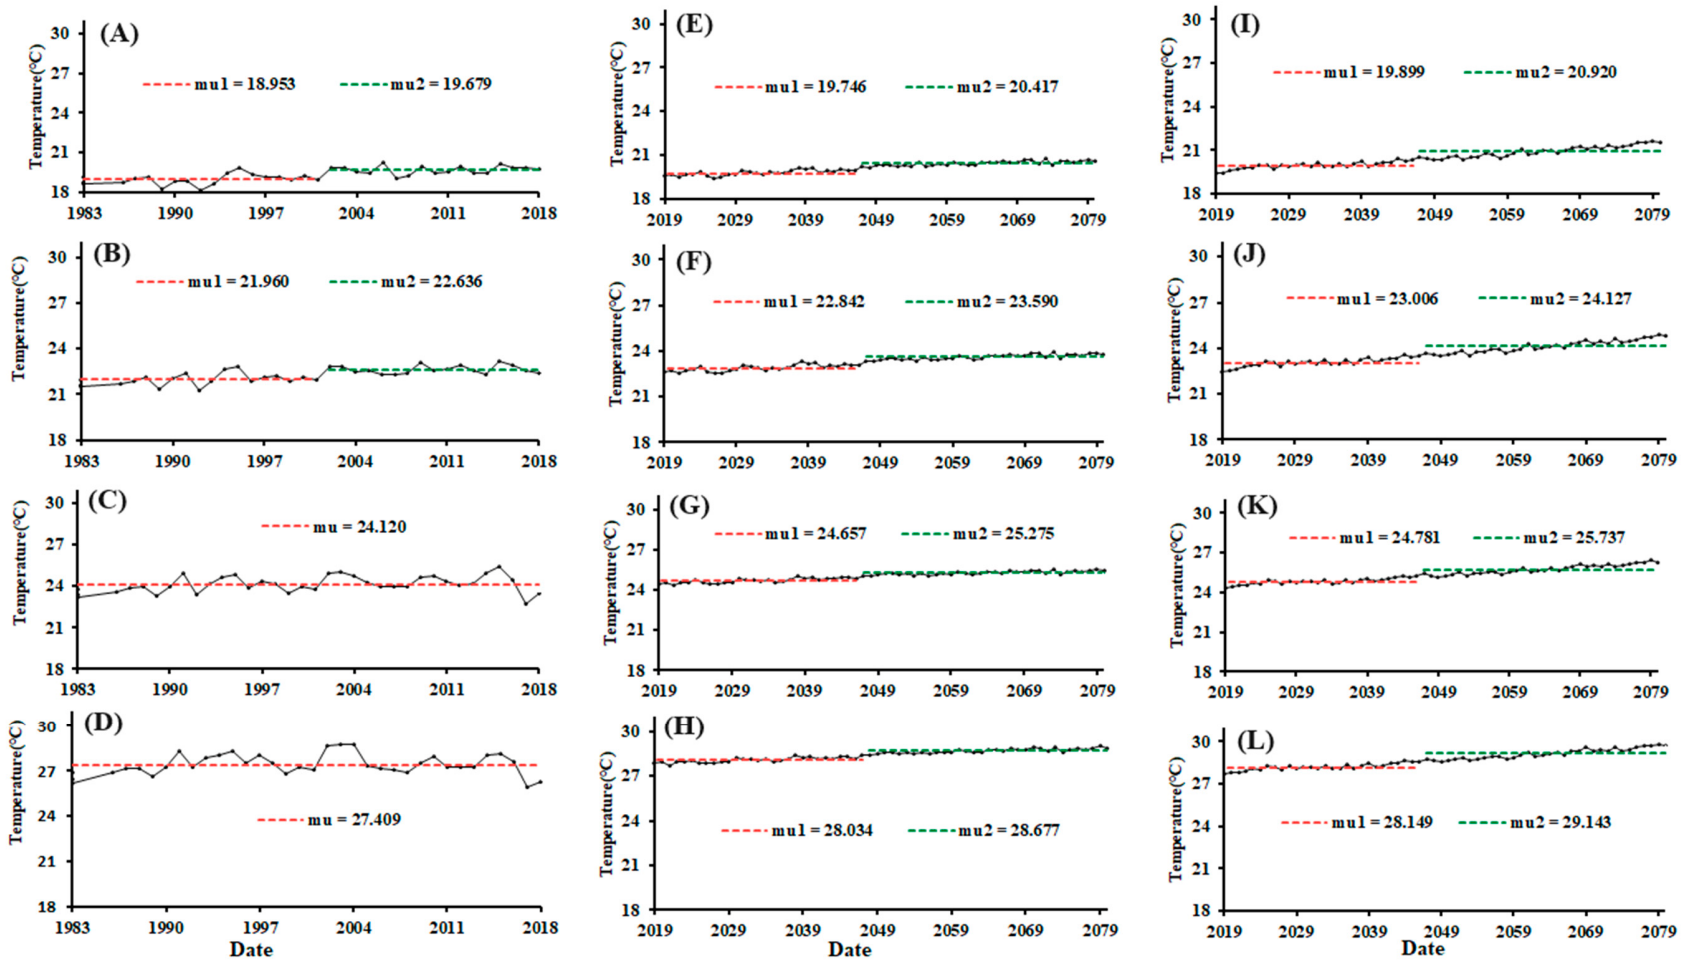

**Figure S6.** Pettitt's test for change point detection in historical minimum temperature (A–D) and future downscaled minimum temperature under the SSP2-4.5 climate scenario (E–H) and under the SSP5-8.5 climate scenario (I–L) in the Wet Wurch, Moist Dega, Moist Weyna Dega, and Moist Kolla agroecological environments, respectively. Where  $\mu_1$  and  $\mu_2$  are the mean minimum temperature before and after change point has occurred respectively.

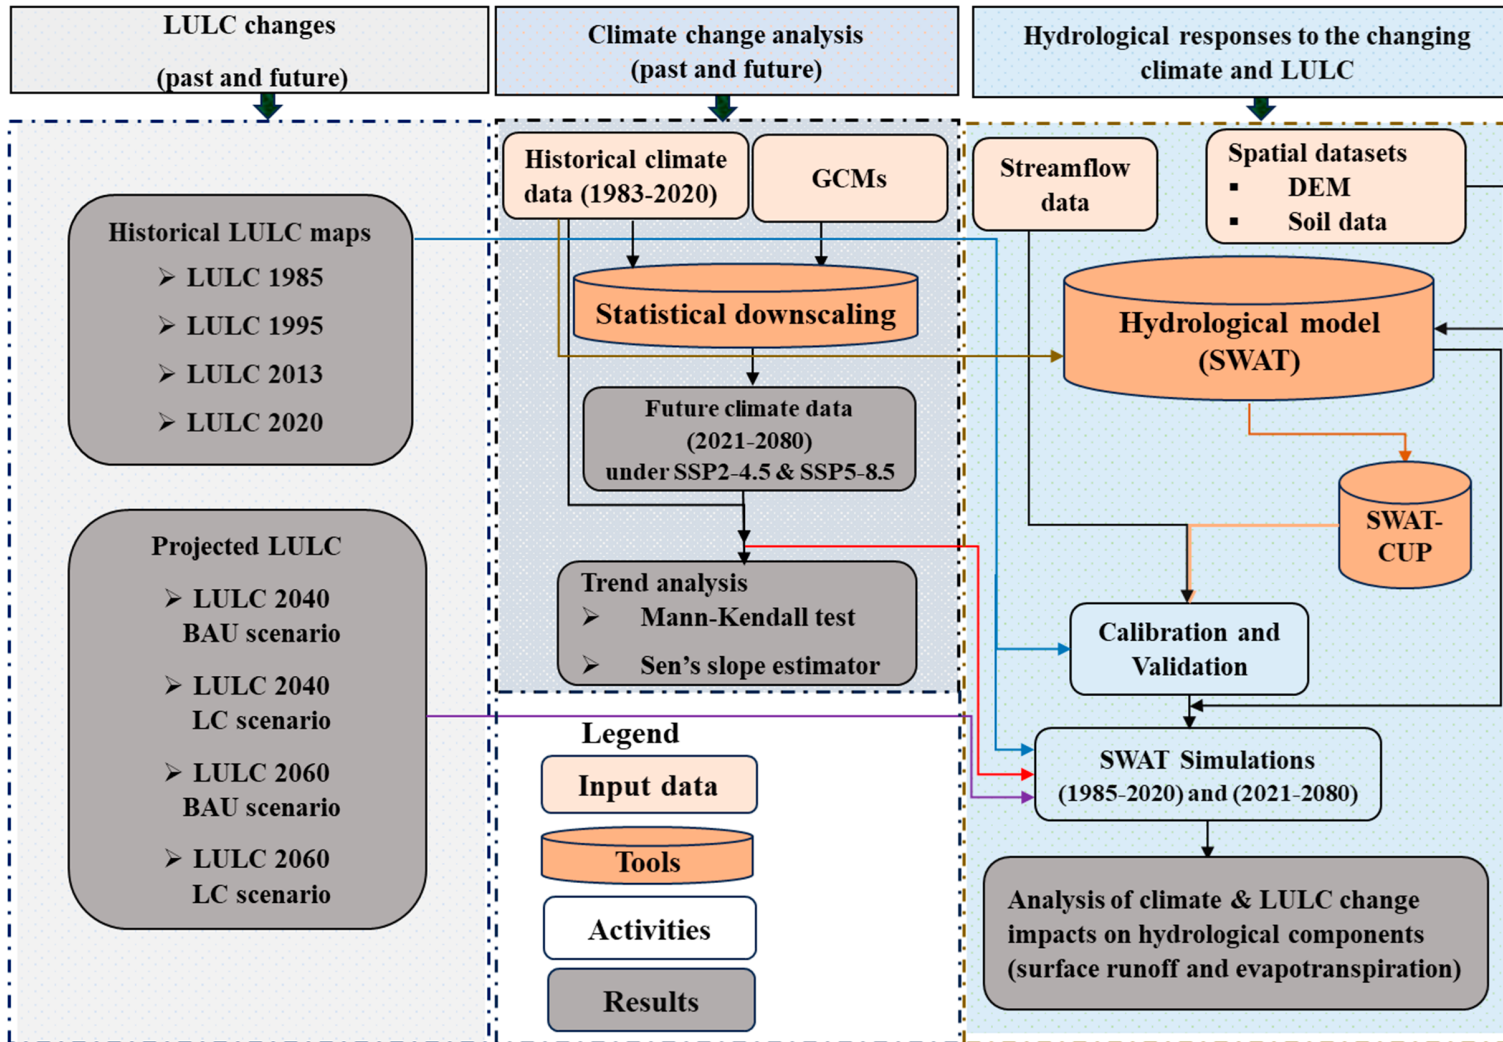

**Figure S7.** Methodological framework employed for land use/land cover and climate change impact studies on water balance. The land use/land cover (LULC) datasets utilized in this study were obtained from [2]. BAU (business-as-usual) and LC (Land conservation), representing different LULC projection scenarios.

**Table S5.** SWAT model parameters with their initial values.

| Parameter      | Description                                                                            | Initial range |
|----------------|----------------------------------------------------------------------------------------|---------------|
| r_CN2.mgt      | SCS runoff curve number for moisture condition II                                      | 35–98         |
| v_REVAPMN.gw   | Threshold depth of water (mm) in the shallow aquifer for ‘revap’ to occur              | 0–500         |
| v_GW_REVAP.gw  | Groundwater ‘revap’ coefficient                                                        | 0.02–0.2      |
| v_GW_DELAY.gw  | Groundwater delay (days)                                                               | 0–500         |
| v_ALPHA_BF.gw  | Baseflow alpha factor (days)                                                           | 0–1           |
| v_GWQMN.gw     | Threshold depth of water (mm) in the shallow aquifer required for return flow to occur | 0–5000        |
| r_ESCO.hru     | Soil evaporation compensation factor                                                   | 0–1           |
| r_HRU_SLP.hru  | Average slope steepness                                                                | 0–1           |
| r_SLSUBBSN.hru | Average slope length                                                                   | 10–150        |
| r_CH_K2.rte    | Effective hydraulic conductivity in main channel alluvium                              | -0.01–500     |
| r_CH_N2.rte    | Manning’s ‘n’ value for the main channel                                               | -0.01–0.3     |
| r_SURLAG.bsn   | Surface runoff lag time                                                                | 0.05–24       |
| r_SOL_BD.sol   | Moist bulk density                                                                     | 0–1           |
| r_SOL_AWC.sol  | Available water capacity of the soil layer                                             | 0–1           |
| r_SOL_K.sol    | Saturated hydraulic conductivity                                                       | 0–2000        |
| r_SOL_CBN.sol  | Organic carbon content                                                                 | 0.05–10       |
| r_SOL_ALB.sol  | Moist soil albedo                                                                      | 0–0.25        |
| r_SOL_ZMX.sol  | Maximum rooting depth of soil profile.                                                 | 0–3500        |

**Table S6.** Final optimized parameter values within the parameter range during the last iteration of calibration.

|    | Parameter name     | Fitted value | Min value | Max value |
|----|--------------------|--------------|-----------|-----------|
| 1  | V__REVAPMN.gw      | 220.17       | 160.19    | 289.19    |
| 2  | V__GW_REVAP.gw     | 1.73         | 1.49      | 2.86      |
| 3  | R__CH_K2.rte       | 3.20         | -2.86     | 4.58      |
| 4  | R__HRU_SLP.hru     | -0.20        | -0.59     | -0.18     |
| 5  | R__SURLAG.bsn      | 49.14        | 48.93     | 91.57     |
| 6  | R__CN2.mgt         | -0.72        | -8.09     | 2.51      |
| 7  | V__ALPHA_BF.gw     | -13.98       | -26.94    | -13.23    |
| 8  | R__SOL_AWC(..).sol | -0.69        | -5.98     | 7.76      |
| 9  | R__SOL_K(..).sol   | 29.52        | -103.03   | 201.67    |
| 10 | V__GW_DELAY.gw     | 115.80       | -148.43   | 160.61    |

Note: “R\_” refers to a relative change in the parameter where the default values are multiplied by 1 plus a factor in the parameter range, while “V\_” refers to the substitution of the default parameter by a value from the parameter range.

## 2A. Model performance evaluation

During both the calibration and validation phases, the model's performance was assessed using essential goodness-of-fit evaluation criteria, including the coefficient of determination ( $R^2$ ) [11], Nash and Sutcliffe simulation efficiency (NSE) [12], and percent Bias (PBIAS) [13].

### Coefficient of determination

The coefficient of determination ( $R^2$ ) value, varying from 0 to 1, indicates the extent to which the predicted dispersion accounts for the observed dispersion [13]. If the value is zero, there is no correlation, while a value of 1 suggests that the prediction's dispersion matches that of the observations.

$$R^2 = 1 - \frac{\sum(\text{Simulated flow} - \text{average simulated flow})^2}{\sum(\text{Observed flow} - \text{average observed flow})^2}$$

### Nash–Sutcliffe efficiencies

The Nash-Sutcliffe efficiencies (NSE) vary between infinity and one, computed by assessing the model's fitness against the variance of observed data [13]. An NSE value of one indicates an exact alignment between the modeled discharge and the measured data. It is calculated as one minus the total of the absolute squared deviations between predicted and observed values, normalized by the variance of the observed values within the specified investigation period.

$$NSE = 1 - \frac{\sum(\text{Simulated flow } (i) - \text{observed flow})^2}{\sum(\text{Observed flow } (i) - \text{average observed flow})^2}$$

### Percent of bias

The percentage of bias (PBIAS) assesses how the simulated values generally lean towards being either larger or smaller than their observed equivalents. An ideal PBIAS value is zero. PBIAS represents the percentage-based variance between the data being assessed. A positive PBIAS value suggests that the model tends to underestimate measured values, while negative values imply an overestimation [13].

$$PBIAS = \sum \frac{\text{Simulated flow} - \text{observed flow}}{\text{Observed flow}} \times 100$$

According to Moriasi [13], model performance is categorized as excellent if  $R^2$  or NSE is equal to or greater than 0.90, very good if it falls within the range of 0.75 to 0.89, good if it ranges from 0.50 to 0.74, fair if it falls between 0.25 to 0.49, poor if it's between 0 and 0.24, and unsatisfactory if  $R^2$  or NSE is less than 0.

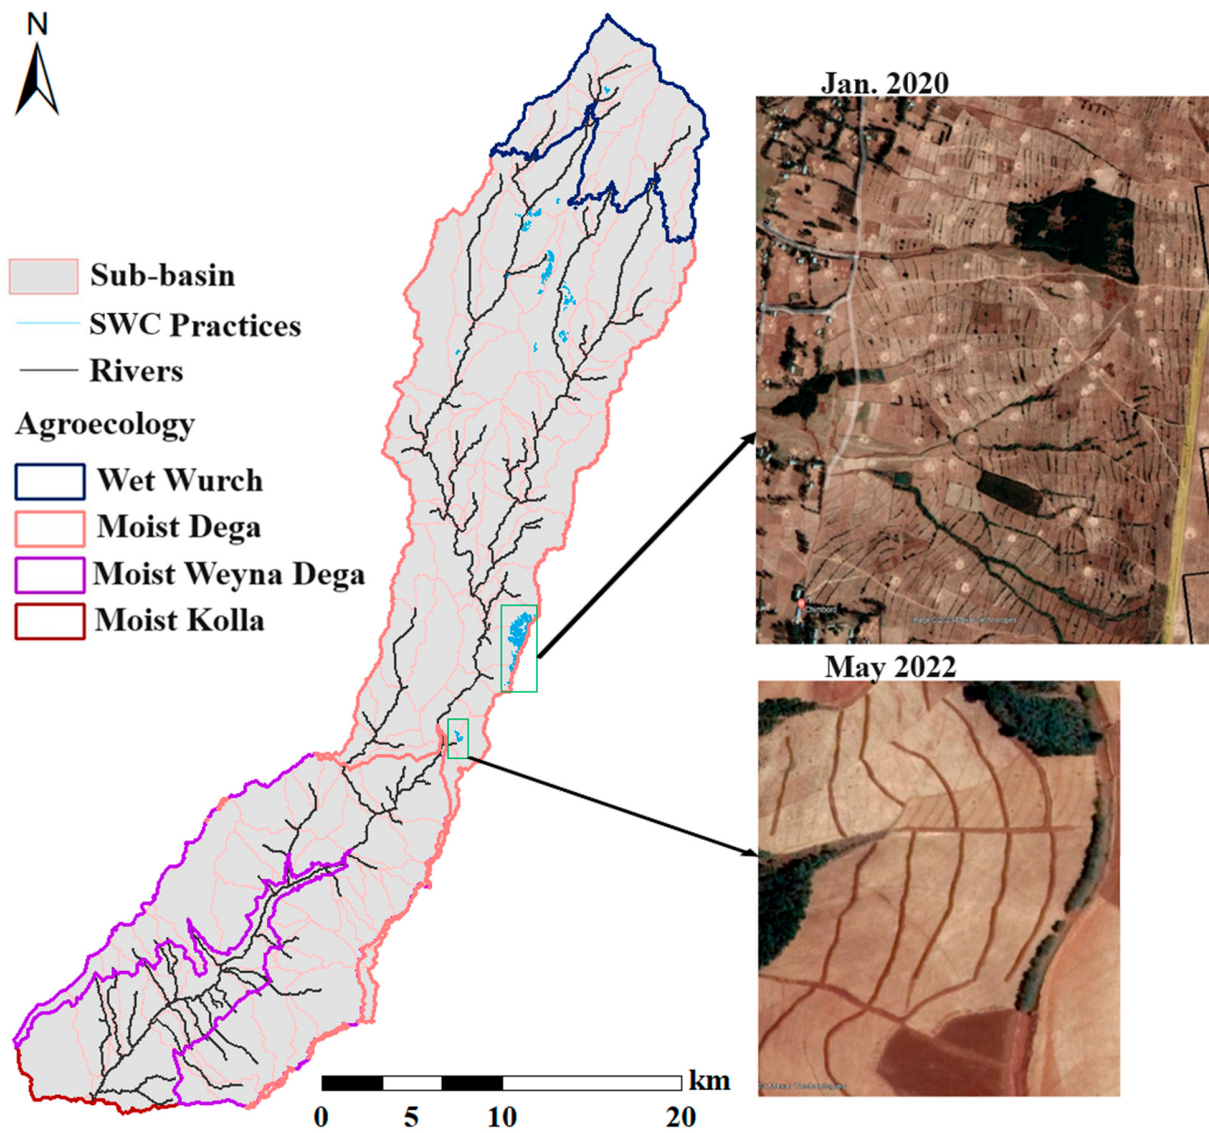

**Figure S8.** Soil and Water Conservation (SWC) practices (bunds with/out grass) identified, along with the corresponding images captured from Google Earth.

**Table S7.** The SWAT model simulated results of hydrological responses to the separate and combined impacts of climate and land use/land cover (LULC) changes. RF is the mean annual rainfall, SR is annual runoff, and ET is annual evapotranspiration. The bolded climate periods after 2020 represent the SSP5-8.5 scenario while the non-bolded periods after 2020 represent the SSP2-4.5 climate scenario. \* denotes for projected LULC under the LC scenario; values without \* are for the BAU scenario projection.

| Scenario | LULC | Climate period   | RF (mm) | SR (mm) | ET (mm) | Scenario | LULC  | Climate period   | SR (mm) | SR (mm) | ET (mm) |
|----------|------|------------------|---------|---------|---------|----------|-------|------------------|---------|---------|---------|
| S1       | 1985 | 1983–2002        | 1232    | 434     | 320     | S15      | 2040  | <b>2051–2080</b> | 1458    | 741     | 380     |
| S2       | 1985 | 2003–2020        | 1286    | 430     | 350     | S16      | 2060  | 2021–2050        | 1311    | 764     | 351     |
| S3       | 1995 | 1983–2002        | 1232    | 483     | 316     | S17      | 2060  | <b>2021–2050</b> | 1352    | 774     | 351     |
| S4       | 1995 | 2003–2020        | 1286    | 484     | 345     | S18      | 2060  | 2051–2080        | 1311    | 794     | 370     |
| S5       | 2013 | 1983–2002        | 1232    | 544     | 312     | S19      | 2060  | <b>2051–2080</b> | 1458    | 809     | 378     |
| S6       | 2013 | 2003–2020        | 1286    | 563     | 338     | S20      | 2040* | 2003–2020        | 1286    | 500     | 349     |
| S7       | 2020 | 1983–2002        | 1232    | 615     | 303     | S21      | 2040* | 2021–2050        | 1311    | 533     | 371     |
| S8       | 2020 | 2003–2020        | 1286    | 626     | 334     | S22      | 2040* | <b>2021–2050</b> | 1352    | 539     | 376     |
| S9       | 2040 | 2003–2020        | 1286    | 690     | 322     | S23      | 2040* | 2051–2080        | 1311    | 550     | 390     |
| S10      | 2020 | 2021–2050        | 1311    | 631     | 351     | S24      | 2040* | <b>2051–2080</b> | 1458    | 557     | 396     |
| S11      | 2020 | <b>2021–2050</b> | 1352    | 639     | 353     | S25      | 2060* | 2021–2050        | 1311    | 518     | 372     |
| S12      | 2040 | 2021–2050        | 1311    | 698     | 349     | S26      | 2060* | <b>2021–2050</b> | 1352    | 523     | 376     |
| S13      | 2040 | <b>2021–2050</b> | 1352    | 710     | 353     | S27      | 2060* | 2051–2080        | 1311    | 528     | 391     |
| S14      | 2040 | 2051–2080        | 1311    | 719     | 367     | S28      | 2060* | <b>2051–2080</b> | 1458    | 536     | 402     |

**Table S8.** SWAT model simulated results of hydrological responses to the separate and combined impacts of climate and land use/land cover (LULC) changes in four agroecological environments. RF denotes the mean annual rainfall; SR, the mean annual runoff; and ET, the mean annual evapotranspiration. The bolded climate periods represent the SSP5-8.5 climate scenario while the non-bolded periods represent the SSP2-4.5 climate scenario. \* denotes the LULC map for projected LULC under the LC scenario; values without \* are for the BAU scenario projection.

| Agroecology | Scenario | LULC | Climate period   | RF (mm) | SR (mm) | ET (mm) | Scenario | LULC  | Climate period   | RF (mm) | SR (mm) | ET (mm) |
|-------------|----------|------|------------------|---------|---------|---------|----------|-------|------------------|---------|---------|---------|
| Wet Wurch   | S1       | 1985 | 1983–2002        | 1394    | 309     | 294     | S15      | 2040  | <b>2051–2080</b> | 1600    | 637     | 330     |
|             | S2       | 1985 | 2003–2020        | 1423    | 311     | 310     | S16      | 2060  | 2021–2050        | 1421    | 654     | 306     |
|             | S3       | 1995 | 1983–2002        | 1394    | 405     | 285     | S17      | 2060  | <b>2021–2050</b> | 1465    | 664     | 303     |
|             | S4       | 1995 | 2003–2020        | 1423    | 406     | 310     | S18      | 2060  | 2051–2080        | 1419    | 664     | 321     |
|             | S5       | 2013 | 1983–2002        | 1437    | 475     | 282     | S19      | 2060  | <b>2051–2080</b> | 1600    | 698     | 322     |
|             | S6       | 2013 | 2003–2020        | 1424    | 483     | 299     | S20      | 2040* | 2003–2020        | 1423    | 434     | 309     |
|             | S7       | 2020 | 1983–2002        | 1394    | 522     | 277     | S21      | 2040* | 2021–2050        | 1421    | 438     | 323     |
|             | S8       | 2020 | 2003–2020        | 1423    | 522     | 296     | S22      | 2040* | <b>2021–2050</b> | 1465    | 441     | 328     |
|             | S9       | 2040 | 2003–2020        | 1423    | 588     | 292     | S23      | 2040* | 2051–2080        | 1419    | 444     | 340     |
|             | S10      | 2020 | 2021–2050        | 1421    | 523     | 319     | S24      | 2040* | <b>2051–2080</b> | 1600    | 457     | 353     |
|             | S11      | 2020 | <b>2021–2050</b> | 1465    | 530     | 317     | S25      | 2060* | 2021–2050        | 1421    | 434     | 330     |
|             | S12      | 2040 | 2021–2050        | 1421    | 593     | 311     | S26      | 2060* | <b>2021–2050</b> | 1465    | 435     | 340     |
|             | S13      | 2040 | <b>2021–2050</b> | 1465    | 608     | 315     | S27      | 2060* | 2051–2080        | 1419    | 436     | 351     |
|             | S14      | 2040 | 2051–2080        | 1419    | 605     | 327     | S28      | 2060* | <b>2051–2080</b> | 1600    | 437     | 357     |
| Moist Dega  | S1       | 1985 | 1983–2002        | 1267    | 559     | 309     | S15      | 2040  | <b>2051–2080</b> | 1491    | 751     | 366     |
|             | S2       | 1985 | 2003–2020        | 1284    | 562     | 337     | S16      | 2060  | 2021–2050        | 1320    | 757     | 347     |
|             | S3       | 1995 | 1983–2002        | 1267    | 580     | 310     | S17      | 2060  | <b>2021–2050</b> | 1372    | 775     | 343     |
|             | S4       | 1995 | 2003–2020        | 1284    | 583     | 335     | S18      | 2060  | 2051–2080        | 1314    | 781     | 363     |
|             | S5       | 2013 | 1983–2002        | 1289    | 613     | 304     | S19      | 2060  | <b>2051–2080</b> | 1491    | 813     | 369     |
|             | S6       | 2013 | 2003–2020        | 1284    | 630     | 332     | S20      | 2040* | 2003–2020        | 1284    | 520     | 344     |
|             | S7       | 2020 | 1983–2002        | 1267    | 632     | 299     | S21      | 2040* | 2021–2050        | 1320    | 545     | 364     |
|             | S8       | 2020 | 2003–2020        | 1284    | 647     | 332     | S22      | 2040* | <b>2021–2050</b> | 1372    | 557     | 368     |
|             | S9       | 2040 | 2003–2020        | 1284    | 694     | 316     | S23      | 2040* | 2051–2080        | 1314    | 555     | 379     |
|             | S10      | 2020 | 2021–2050        | 1320    | 635     | 336     | S24      | 2040* | <b>2051–2080</b> | 1491    | 579     | 384     |
|             | S11      | 2020 | <b>2021–2050</b> | 1372    | 642     | 338     | S25      | 2060* | 2021–2050        | 1320    | 528     | 363     |
|             | S12      | 2040 | 2021–2050        | 1320    | 694     | 339     | S26      | 2060* | <b>2021–2050</b> | 1372    | 543     | 363     |

|                     |     |      |                  |      |     |     |     |       |                  |      |     |     |
|---------------------|-----|------|------------------|------|-----|-----|-----|-------|------------------|------|-----|-----|
|                     | S13 | 2040 | <b>2021–2050</b> | 1372 | 712 | 342 | S27 | 2060* | 2051–2080        | 1314 | 545 | 392 |
|                     | S14 | 2040 | 2051–2080        | 1314 | 715 | 360 | S28 | 2060* | <b>2051–2080</b> | 1491 | 562 | 398 |
| Moist Weyna<br>Dega | S1  | 1985 | 1983–2002        | 1183 | 517 | 302 | S15 | 2040  | <b>2051–2080</b> | 1446 | 819 | 399 |
|                     | S2  | 1985 | 2003–2020        | 1277 | 522 | 332 | S16 | 2060  | 2021–2050        | 1303 | 829 | 358 |
|                     | S3  | 1995 | 1983–2002        | 1183 | 573 | 300 | S17 | 2060  | <b>2021–2050</b> | 1353 | 842 | 363 |
|                     | S4  | 1995 | 2003–2020        | 1277 | 595 | 327 | S18 | 2060  | 2051–2080        | 1297 | 857 | 385 |
|                     | S5  | 2013 | 1983–2002        | 1192 | 635 | 296 | S19 | 2060  | <b>2051–2080</b> | 1446 | 877 | 392 |
|                     | S6  | 2013 | 2003–2020        | 1277 | 665 | 325 | S20 | 2040* | 2003–2020        | 1278 | 533 | 346 |
|                     | S7  | 2020 | 1983–2002        | 1183 | 696 | 296 | S21 | 2040* | 2021–2050        | 1303 | 547 | 382 |
|                     | S8  | 2020 | 2003–2020        | 1277 | 714 | 325 | S22 | 2040* | <b>2021–2050</b> | 1353 | 567 | 392 |
|                     | S9  | 2040 | 2003–2020        | 1278 | 774 | 323 | S23 | 2040* | 2051–2080        | 1299 | 558 | 417 |
|                     | S10 | 2020 | 2021–2050        | 1303 | 734 | 364 | S24 | 2040* | <b>2051–2080</b> | 1445 | 590 | 426 |
|                     | S11 | 2020 | <b>2021–2050</b> | 1353 | 748 | 370 | S25 | 2060* | 2021–2050        | 1303 | 536 | 390 |
|                     | S12 | 2040 | 2021–2050        | 1303 | 789 | 359 | S26 | 2060* | <b>2021–2050</b> | 1353 | 546 | 397 |
|                     | S13 | 2040 | <b>2021–2050</b> | 1353 | 795 | 364 | S27 | 2060* | 2051–2080        | 1299 | 541 | 418 |
|                     | S14 | 2040 | 2051–2080        | 1299 | 798 | 389 | S28 | 2060* | <b>2051–2080</b> | 1446 | 553 | 431 |
| Moist Kolla         | S1  | 1985 | 1983–2002        | 1119 | 50  | 376 | S15 | 2040  | <b>2051–2080</b> | 1471 | 523 | 155 |
|                     | S2  | 1985 | 2003–2020        | 1232 | 51  | 409 | S16 | 2060  | 2021–2050        | 1244 | 618 | 136 |
|                     | S3  | 1995 | 1983–2002        | 1119 | 74  | 359 | S17 | 2060  | <b>2021–2050</b> | 1235 | 628 | 139 |
|                     | S4  | 1995 | 2003–2020        | 1232 | 105 | 393 | S18 | 2060  | 2051–2080        | 1263 | 690 | 150 |
|                     | S5  | 2013 | 1983–2002        | 1131 | 270 | 339 | S19 | 2060  | <b>2051–2080</b> | 1310 | 648 | 155 |
|                     | S6  | 2013 | 2003–2020        | 1232 | 306 | 367 | S20 | 2040* | 2003–2020        | 1234 | 450 | 115 |
|                     | S7  | 2020 | 1983–2002        | 1119 | 406 | 342 | S21 | 2040* | 2021–2050        | 1244 | 483 | 140 |
|                     | S8  | 2020 | 2003–2020        | 1232 | 421 | 370 | S22 | 2040* | <b>2021–2050</b> | 1235 | 474 | 145 |
|                     | S9  | 2040 | 2003–2020        | 1234 | 470 | 113 | S23 | 2040* | 2051–2080        | 1263 | 494 | 153 |
|                     | S10 | 2020 | 2021–2050        | 1243 | 441 | 140 | S24 | 2040* | <b>2051–2080</b> | 1310 | 490 | 158 |
|                     | S11 | 2020 | <b>2021–2050</b> | 1234 | 446 | 145 | S25 | 2060* | 2021–2050        | 1244 | 464 | 140 |
|                     | S12 | 2040 | 2021–2050        | 1244 | 479 | 137 | S26 | 2060* | <b>2021–2050</b> | 1235 | 441 | 145 |
|                     | S13 | 2040 | <b>2021–2050</b> | 1235 | 498 | 143 | S27 | 2060* | 2051–2080        | 1263 | 484 | 154 |
|                     | S14 | 2040 | 2051–2080        | 1263 | 501 | 152 | S28 | 2060* | <b>2051–2080</b> | 1310 | 481 | 160 |

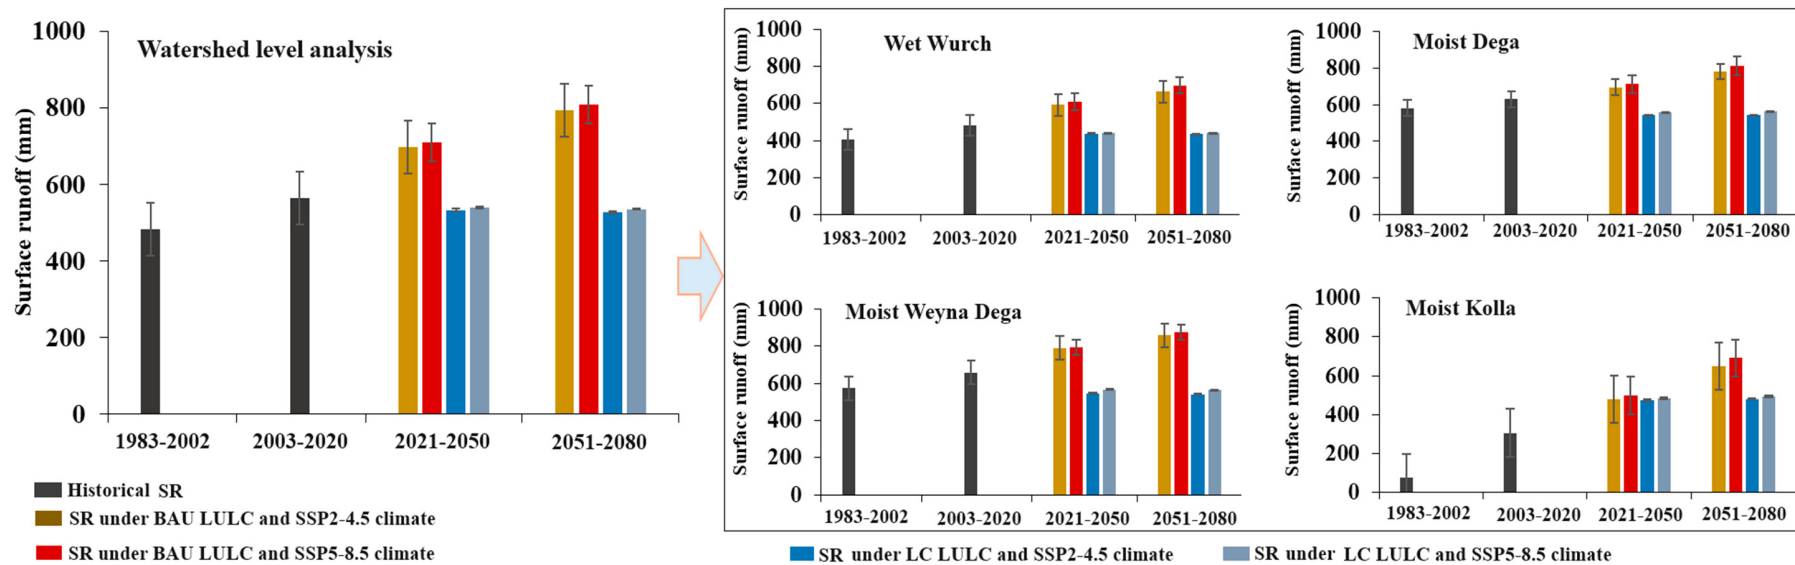

**Figure S9.** Mean annual surface runoff (SR) both at the watershed level (on the left) and across four distinct agroecological environments (on the right). BAU (business-as-usual) and LC (Land conservation), representing different LULC projection scenarios. The error bars represent the temporal dynamics of evapotranspiration and overlapping bars imply no significant difference between adjacent time periods.

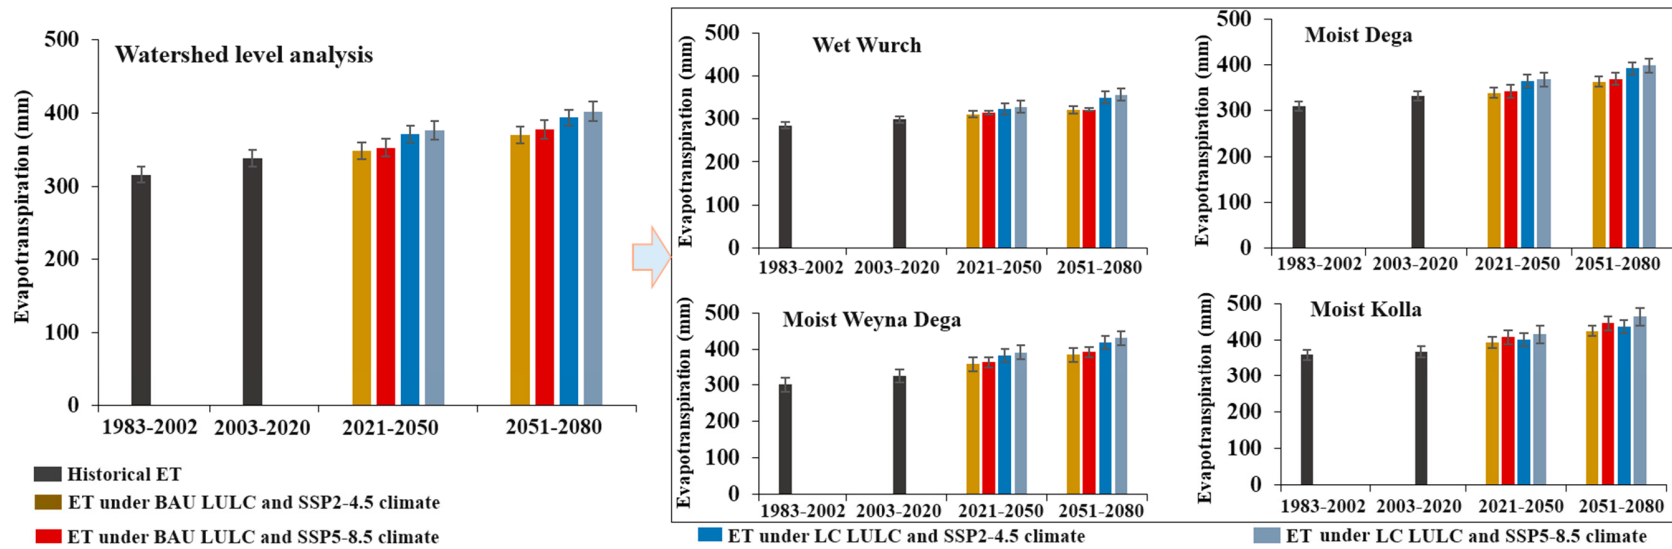

**Figure S10.** Mean annual Evapotranspiration (ET) both at the watershed level (on the left) and across four distinct agroecological environments (on the right). BAU (business-as-usual) and LC (Land conservation), representing different LULC projection scenarios. The error bars represent the temporal dynamics of evapotranspiration and overlapping bars imply no significant difference between adjacent time periods.

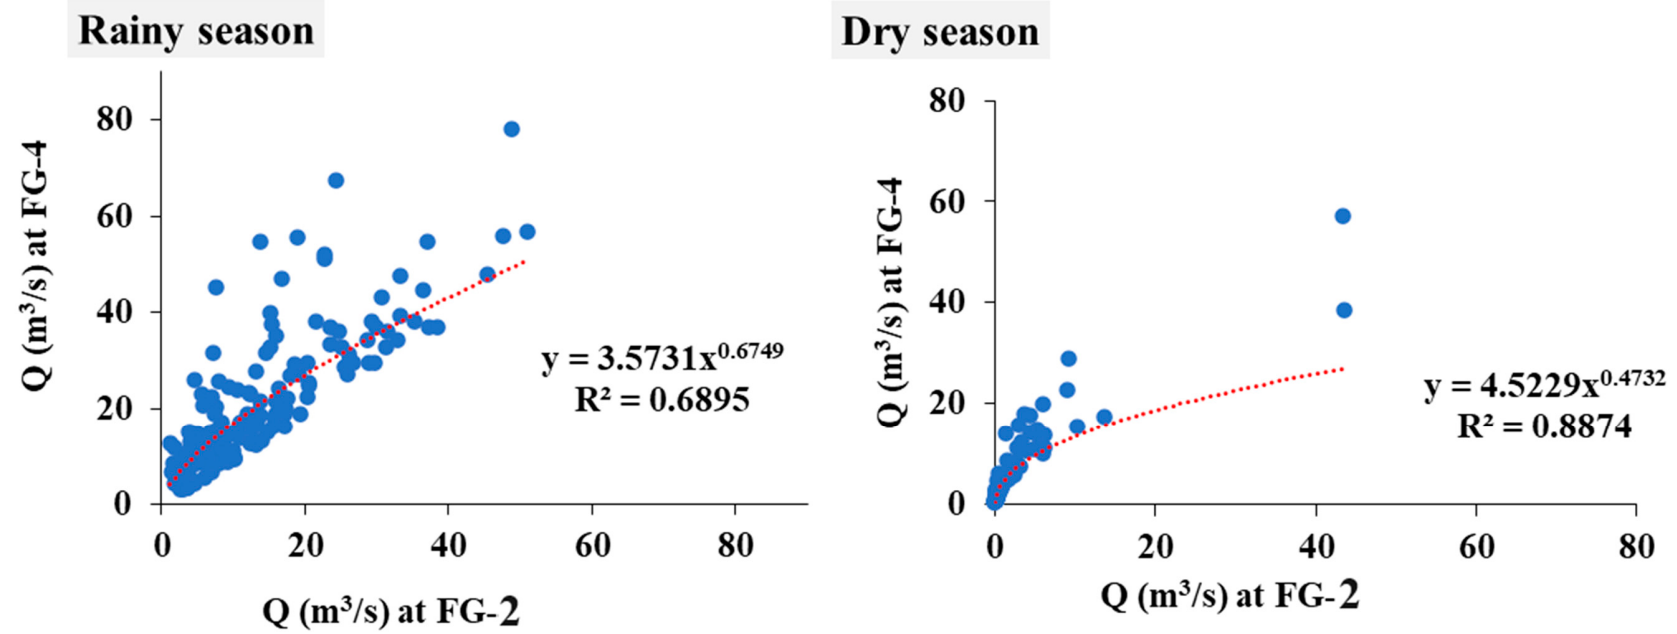

**Figure S11.** Correlation of streamflow between stations FG-2 and FG-4 in the rainy and dry seasons.

## References

1. Boori, M. S.; Paringer, R.; Choudhary, K.; Kupriyanov, A. Supervised and unsupervised classification for obtaining land use/cover classes from hyperspectral and multi-spectral imagery. In *Sixth International Conference on Remote Sensing and Geoinformation of the Environment (RSCy2018)*; SPIE, 2018; Vol. 10773, pp 191–201.
2. Meshesha, T. M.; Tsunekawa, A.; Haregeweyn, N.; Tsubo, M.; Fenta, A. A.; Berihun, M. L.; et al. Agroecology-based land use/land cover change detection, prediction, and its implications for land degradation: a case study in the Upper Blue Nile Basin. *International Soil and Water Conservation Research* **2024**, 12(1), 1–12.
3. Eastman, J. R. *TerrSet 2020—Geospatial Monitoring and Modeling System Manual*. Worcester, MA: Clark Labs, Clark University **2020**.
4. Bunyangha, J.; Majaliwa, M. J. G.; Muthumbi, A. W.; Gichuki, N. N.; Egeru, A. Past and future land use/land cover changes from multi-temporal Landsat imagery in Mpologoma catchment, eastern Uganda. *Egyptian Journal of Remote Sensing and Space Science* **2021**, 24(3), 675–685. doi: 10.1016/j.ejrs.2021.02.003.
5. Berihun, M. L.; Tsunekawa, A.; Haregeweyn, N.; Tsubo, M.; Fenta, A. A.; Ebabu, K.; et al. Reduced runoff and sediment loss under alternative land capability-based land use and management options in a sub-humid watershed of Ethiopia. *Journal of Hydrology: Regional Studies* **2022**, 40, 100998.
6. Kindu, M.; Schneider, T.; Döllner, M.; Teketay, D.; Knoke, T. Scenario modelling of land use/land cover changes in Munessa-Shashemene landscape of the Ethiopian highlands. *Science of the Total Environment* **2018**, 622–623, 534–546. doi: 10.1016/j.scitotenv.2017.11.338.
7. Jagger, P. A. management of less-favored lands: Policies for sustainable land management in the highlands of Ethiopia. **2015**, No. August 22–23.
8. Holthuijzen, M.; Beckage, B.; Clemens, P. J.; Higdon, D.; Winter, J. M. Robust bias-correction of precipitation extremes using a novel hybrid empirical quantile-mapping method: Advantages of a linear correction for extremes. *Theoretical and Applied Climatology* **2022**, 149(1–2), 863–882.
9. Enayati, M.; Bozorg-Haddad, O.; Bazrafshan, J.; Hejabi, S.; Chu, X. Bias correction capabilities of quantile mapping methods for rainfall and temperature variables. *Journal of Water and Climate Change* **2021**, 12(2), 401–419.
10. Cannon, A. J.; Sobie, S. R.; Murdock, T. Q. Bias correction of GCM precipitation by quantile mapping: how well do methods preserve changes in quantiles and extremes? *Journal of Climate* **2015**, 28(17), 6938–6959.
11. Krause, P.; Boyle, D. P.; Bäse, F. Comparison of different efficiency criteria for hydrological model assessment. *Advances in geosciences* **2005**, 5, 89–97.

12. Nash, J. E.; Sutcliffe, J. V. River flow forecasting through conceptual models' part I—A discussion of principles. *Journal of hydrology* **1970**, *10*(3), 282–290.
13. Moriasi, D. N.; Arnold, J. G.; Van Liew, M. W.; Bingner, R. L.; Harmel, R. D.; Veith, T. L. Model evaluation guidelines for systematic quantification of accuracy in watershed simulations. *Transactions of the ASABE* **2007**, *50*(3), 885–900.
